# Supplementary material for: The Mediating Role of Psychological Resilience in the Relationship Between Health Anxiety and Burnout Among Healthcare Workers Working in Closed Environments
Source: Research Square preprint supplement (doi:10.21203/rs.3.rs-8054758/v1), 2025-11-13
Supplement: Supplementary file 1 [file 4d66d17435bd5760da87cac1.docx]

# Supplementary Material

## S1. Measurement Instruments Overview

This supplementary file provides detailed information about the measurement instruments used in the study, including the number of items, sample items, response scales, and confirmatory factor analysis (CFA) results for each construct. All scales were administered in Turkish, and translations were validated through back-translation.

## Structural Model Goodness of Fit Values

| **Good Fit Index** | **Good Fit** | **Acceptable Fit** | **Goodness of Fit Value** |
| --- | --- | --- | --- |
| χ2/sd | χ2/sd <3 | 3<χ2/sd<5 | **3.710** |
| GFI | .95≤ GFI≤1 | .90≤ GFI≤. 95 | **.93** |
| AGFI | .95≤AGFI≤ 1 | .90≤ AGFI≤.95 | **.89** |
| CFI | .95≤CFI≤1 | .90≤CFI≤. 95 | **.90** |
| RMSEA | .00≤RMSEA≤ .05 | .05≤RMSEA≤ .08 | **.088** |
| SRMR | .00≤ SRMR≤.05 | .05≤ SRMR≤.08 | **.064** |
| NFI | .95≤ NFI≤1 | .90≤ NFI≤. 95 | **.87** |
| IFI | .95≤ IFI≤1 | .90≤ IFI≤. 95 | **.90** |
| TLI | .95 ≤TLI≤1 | .90 ≤TLI≤.95 | **.86** |

## Parameter Values ​​of the Structural Model

| **Road** | **Standardized Factor Loading Value** | **Standard Error** | **T** | **p** |
| --- | --- | --- | --- | --- |
| Psk_Health Psk_Ank | -.308 | .027 | -4.039 | **.000** |
| Exhausted Psk_Health | -.210 | .598 | -3.208 | **.000** |
| Exhausted Sag_Ank | .522 | .200 | 8.401 | **.000** |
| *SAO_Negative_Consequences Sag_Ank | .778 |  |  | **.000** |
| SAO_Hypersensitivity_Anxiety Health_Ank | .897 | .288 | 10.994 | **.000** |
| *Emotional_Exhaustion Exhausted | .921 |  |  | **.000** |
| Depersonalization Exhausted | .728 | .039 | 11.023 | **.000** |
| Personal_Achievement Exhausted | -.280 | .036 | -4.844 | **.000** |
| *PS_Structural_Style Psk_Health | .442 |  |  | **.000** |
| PS_Future_Perception Psk_Health | .612 | .200 | 6.609 | **.000** |
| PS_Family_Adjustment Psk_Health | .411 | .283 | 5.327 | **.000** |
| PS_Self_Perception Psk_Health | .778 | .324 | 7.039 | **.000** |
| PS_Social_Competence Psk_Health | .492 | .248 | 5.937 | **.000** |
| PS_Social_Resources Psk_Health | .553 | .274 | 6.320 | **.000** |

## Parameter Values ​​of the Measurement Model

| **Road** | **Standardized Factor Loading Value** | **Standard Error** | **T** | **p** |
| --- | --- | --- | --- | --- |
| PSYCHICALLY SOLID PS_Social_Resources | ,546 | ,086 | 8,849 | **.000** |
| PSYCHICALLY SOLID PS_Social_Competence | ,518 | ,086 | 8,067 | **.000** |
| *PSYCHICALLY SOLID PS_Self_Perception | ,763 |  |  | **.000** |
| PSYCHICALLY SOLID PS_Family_Harmony | ,445 | ,108 | 6,790 | **.000** |
| PSYCHICALLY SOLID PS_Gelecek_Algısı | ,613 | ,063 | 9,313 | **.000** |
| PSYCHICALLY SOLID PS_Structural_Style | ,444 | ,066 | 6,840 | **.000** |
| BURNOUT TDO_Personal_Success | -,277 | ,043 | -4,005 | **.000** |
| BURNOUT TDO_Depersonalization | ,725 | ,039 | 10,939 | **.000** |
| * BURNOUT TDO_Emotional_Exhaustion | ,925 |  |  | **.000** |
| HEALTH ANXIETY SAO_Negative_Results | ,777 | ,029 | 10,921 | **.000** |
| * HEALTH ANXIETY SAO_Hypersensitivity_Anxiety | ,898 |  |  | **.000** |

## Goodness of Fit Values ​​of The Measurement Model

| **Good Fit Index** | **Good Fit** | **Acceptable Fit** | **Goodness of Fit Value** |
| --- | --- | --- | --- |
| χ2/sd | χ2/sd<3 | 3<χ2/sd<5 | **3.833** |
| GFI | .95≤ GFI≤1 | .90≤ GFI≤. 95 | **.93** |
| AGFI | .95≤AGFI≤ 1 | .90≤ AGFI≤.95 | **.89** |
| CFI | .95≤CFI≤1 | .90≤CFI≤. 95 | **.89** |
| RMSEA | .00≤RMSEA≤ .05 | .05≤RMSEA≤ .08 | **.090** |
| SRMR | .00≤ SRMR≤.05 | .05≤ SRMR≤.08 | **.066** |
| NFI | .95≤ NFI≤1 | .90≤ NFI≤. 95 | **.86** |
| IFI | .95≤ IFI≤1 | .90≤ IFI≤. 95 | **.89** |
| TLI | .95 ≤TLI≤1 | .90 ≤TLI≤.95 | **.86** |

## S2. Health Anxiety Inventory (HAI)

• Number of items: 18
• Subdimensions: Health-related worry, somatic awareness, reassurance-seeking behavior
• Response scale: 5-point Likert scale (1 = strongly disagree, 5 = strongly agree)
• Sample item: “I often worry about my health even when I feel fine.”
• Cronbach’s α = .88; Composite Reliability (CR) = .89; Average Variance Extracted (AVE) = .62
• CFA standardized loadings ranged from .54 to .83 (all p < .001).

## S3. Psychological Resilience Scale (PRS)

• Number of items: 12
• Subdimensions: Emotional stability, cognitive flexibility, problem-solving, self-efficacy
• Response scale: 5-point Likert scale (1 = strongly disagree, 5 = strongly agree)
• Sample item: “I can adapt quickly to unexpected situations.”
• Cronbach’s α = .91; CR = .92; AVE = .68
• CFA standardized loadings ranged from .61 to .85 (all p < .001).

## S4. Maslach Burnout Inventory (MBI)

• Number of items: 22
• Subdimensions: Emotional Exhaustion (EE, 9 items), Depersonalization (DP, 5 items), and Personal Accomplishment (PA, 8 items)
• Response scale: 5-point Likert scale (1 = never, 5 = always)
• Sample item (EE): “I feel emotionally drained from my work.”
• Sample item (DP): “I have become more callous toward people since I took this job.”
• Sample item (PA): “I feel very energetic at work.” (reverse-coded)
• Reverse coding: PA items were reverse-coded prior to analysis so that higher total scores indicate greater burnout.
• Cronbach’s α = .93 (EE = .90; DP = .86; PA = .81)
• CFA standardized loadings ranged from .58 to .88 (all p < .001).

## S5. Confirmatory Factor Analysis Summary

| Construct | Subdimensions | No. of Items | CR | AVE | Loading Range |
| --- | --- | --- | --- | --- | --- |
| Health Anxiety Inventory | 3 | 18 | .89 | .62 | .54–.83 |
| Psychological Resilience Scale | 4 | 12 | .92 | .68 | .61–.85 |
| Maslach Burnout Inventory | 3 | 22 | .93 | .64 | .58–.88 |

Note: CR = Composite Reliability; AVE = Average Variance Extracted. All standardized loadings were statistically significant at p < .001.
